# Supplementary material for: Metabolic regulation of misfolded protein import into mitochondria
Source: eLife. 2024 Jun 20;12:RP87518. doi: 10.7554/eLife.87518 (PMC11189628; doi:10.7554/eLife.87518)
Supplement: Figure 1—figure supplement 1—source data 1. [file elife-87518-fig1-figsupp1-data1.xlsx]

## Sheet: Sheet1
	Fig. 1-Figure Supplement 1D
		Mean spGFP intensity by flow cytometry
		30 °C	42 °C
		309	364
		314	382
		313	381
		314	386
		312	395
		396	434
		433	598
		294	388
		129	259
		128	307
		255	286
		283	433
		155	588
		228	310
		141	283
		113	251
		112	235
		107	225
		127	237
		416	561
		477	515
		118	263
		203	325
		287	338
		209	397
		115	221
		135	302
		115	256
		123	222
		113	253
		110	237
		178	296
		257	430
		126	308
		140	230
		549	461
		156	284
		196	427
		303	346
		125	270
		138	269
		289	389
		122	367
		242	378
		131	301
		133	258
		121	281
		109	311
		113	312
		120	297
		444	558
		117	294
		142	311
		909	1022
		190	351
		121	250
		142	285
		141	227
		119	232
		146	281
		201	321
		271	372
		203	304
		266	378
		348	465
		356	419
		293	393
		272	356
		242	358
		302	397
		252	411
		252	408
		374	466
		303	362
		223	325
		278	363
		334	443
		169	295
		291	391
		347	444
		266	386
		339	435
		203	310
		239	354
		363	513
		346	499
		250	389
		275	383
		190	317
		177	244
		245	378
		209	300
		197	320
		153	338
		315	423
		287	350
		346	509
		212	274
		220	273
		235	332
		266	355
		292	388
		214	311
		132	479
		238	387
		136	332
		215	285
		285	399
		272	397
		207	314
		240	295
		231	356
		306	379
		276	462
		225	344
		261	353
		253	370
		307	380
		255	405
		265	389
		250	307
		242	392
		249	369
		327	418
		222	303
		236	320
		253	348
		262	362
		255	367
		270	390
		274	381
		268	385
		342	486
		322	479
		411	375
		185	348
		308	296
		273	374
		293	279
		414	397
		287	292
		314	306
		335	313
		340	411
		269	344
		207	262
		251	288
		245	259
		281	301
		320	327
		267	295
		240	287
		443	416
		276	258
		208	255
		242	268
		233	308
		229	269
		292	316
		271	311
		240	278
		231	283
		352	461
		247	264
		267	290
		215	258
		362	396
		248	286
		386	377
		249	239
		330	446
		411	529
		236	287
		222	280
		203	295
		223	271
		201	290
		223	440
		205	341
		187	309
		169	259
		208	320
		268	432
		207	313
		184	280
		202	296
		348	485
		199	312
		349	458
		221	333
		229	386
		238	636
		188	298
		197	302
		200	324
		192	309
		338	407
		215	336
		202	271
		128	372
		172	276
		198	328
		164	362
		173	385
		164	355
		223	320
		226	649
		423	443
		157	402
		174	321
		173	317
		222	462
		336	331
		165	323
		163	380
		173	274
		228	342
		162	339
		189	324
		164	361
		174	291
		172	372
		227	300
		170	271
		175	281
		177	288
		165	284
		234	338
		175	289
		183	371
		206	395
		301	310
		172	352
		175	328
		173	311
		267	383
		174	282
		233	275
		194	314
		557	695
		206	349
		183	320
		188	312
		278	439
		274	376
		318	301
		167	268
		169	261
		183	411
		173	299
		175	292
		186	298
		186	326
		194	293
		186	291
		170	257
		163	244
		180	249
		177	264
		304	397
		220	364
		179	288
		183	299
		574	631
		286	363
		200	272
		166	281
		183	233
		205	332
		180	289
		319	455
		208	323
		180	273
		180	262
		174	263
		171	259
		197	307
		210	302
		249	334
		437	488
		181	318
		192	301
		381	482
		323	411
		359	353
		280	382
		208	297
		250	386
		212	337
		172	281
		214	1234
		110	550
		442	348
		314	452
		189	313
		198	353
		163	281
		151	288
		185	351
		179	284
		235	377
		325	481
		181	314
		279	499
		469	681
		275	403
		317	392
		198	322
		254	390
		208	268
		312	393
		143	283
		191	323
		312	416
		183	328
		320	423
		401	720
		265	357
		191	340
		251	406
		311	473
		217	401
		279	381
		185	282
		228	347
		284	397
		81	351
		240	336
		241	356
		229	336
		255	345
		220	345
		285	538
		300	488
		313	448
		263	367
		202	336
		305	511
		258	355
		178	299
		296	375
		312	395
		244	355
		301	413
		236	352
		248	341
		228	342
		327	456
		231	528
		302	420
		231	343
		338	386
		347	492
		291	389
		242	341
		260	384
		209	311
		347	539
		349	393
		266	421
		264	392
		318	447
		264	395
		269	400
		256	370
		250	356
		247	346
		260	393
		303	411
		246	355
		245	355
		291	396
		317	396
		291	376
		287	380
		145	172
		204	375
		212	303
		185	342
		310	495
		319	378
		163	232
		312	373
		199	393
		216	163
		192	339
		191	319
		300	476
		304	374
		469	806
		272	416
		198	298
		332	446
		177	283
		406	497
		190	295
		235	351
		168	232
		179	256
		425	521
		179	281
		195	331
		182	310
		185	317
		187	336
		175	324
		234	342
		245	355
		199	351
		238	338
		234	364
		235	347
		237	358
		312	379
		300	379
		190	308
		311	441
		250	296
		193	268
		250	372
		200	350
		177	268
		277	320
		216	402
		246	348
		184	290
		206	356
		187	295
		199	327
		270	469
		200	299
		313	472
		301	412
		193	318
		210	309
		212	323
		213	319
		238	412
		351	416
		171	289
		142	327
		183	303
		189	314
		204	335
		289	402
		117	350
		214	332
		246	344
		301	369
		205	340
		275	402
		369	483
		222	363
		337	457
		422	483
		219	313
		224	346
		219	351
		246	365
		137	309
		129	300
		143	291
		65	326
		146	313
		174	370
		127	324
		143	358
		324	393
		162	263
		183	278
		143	250
		195	278
		275	379
		106	298
		147	267
		143	301
		112	268
		147	268
		248	340
		148	256
		207	272
		140	239
		144	237
		309	249
		163	261
		172	271
		151	254
		176	296
		145	245
		153	259
		248	377
		225	236
		151	225
		169	264
		500	587
		289	395
		234	330
		269	398
		167	273
		206	261
		212	232
		206	294
		270	340
		162	244
		172	312
		158	235
		371	317
		199	244
		166	266
		174	237
		187	277
		302	371
		178	246
		210	251
		217	319
		159	245
		296	374
		436	255
		418	462
		228	335
		260	343
		173	306
		355	586
		226	326
		327	280
		186	288
		221	294
		190	270
		188	365
		158	263
		199	283
		277	457
		217	104
		195	249
		205	313
		205	304
		229	320
		205	278
		193	294
		150	255
		197	326
		362	497
		219	313
		233	316
		207	294
		204	286
		225	295
		194	288
		215	333
		241	348
		229	297
		232	279
		209	284
		257	376
		432	249
		199	295
		212	318
		435	554
		183	335
		221	408
		302	517
		193	314
		242	340
		194	279
		204	300
		255	331
		213	267
		285	441
		192	367
		212	314
		225	334
		258	408
		270	436
		276	458
		296	456
		274	442
		284	443
		279	456
		229	379
		277	415
		262	413
		218	351
		265	424
		153	259
		251	403
		140	262
		241	334
		168	251
		233	357
		246	366
		123	172
		143	258
		159	258
		139	242
		233	354
		281	357
		254	295
		123	210
		115	230
		437	519
		252	282
		161	267
		112	198
		368	366
		146	239
		158	261
		131	231
		216	447
		166	230
		254	360
		117	203
		147	264
		181	228
		160	277
		149	318
		152	220
		229	316
		220	315
		331	282
		207	326
		256	241
		231	266
		231	285
		380	537
		364	484
		260	370
		265	359
		246	287
		527	474
		307	481
		286	398
		258	329
		270	377
		202	318
		230	335
		151	267
		207	330
		208	352
		216	348
		196	292
		222	342
		221	334
		272	312
		315	348
		199	314
		170	204
		280	416
		230	351
		276	395
		240	294
		169	208
		208	326
		238	331
		251	359
		294	392
		225	289
		254	328
		330	339
		211	324
		212	314
		258	336
		292	425
		239	335
		237	344
		250	335
		269	381
		316	420
		229	312
		250	367
		250	327
		229	330
		222	318
		215	322
		218	309
		237	314
		235	345
		259	370
		258	364
		273	417
		229	457
		231	304
		284	400
		262	378
		234	358
		228	305
		235	358
		261	377
		285	334
		285	388
		281	404
		226	310
		227	352
		228	298
		243	314
		268	391
		300	482
		160	266
		232	316
		214	276
		258	333
		307	369
		236	313
		304	455
		240	302
		225	355
		241	325
		224	325
		233	338
		246	317
		449	500
		347	365
		317	439
		262	304
		305	356
		213	334
		233	324
		324	385
		262	308
		250	384
		208	316
		231	317
		276	304
		226	318
		175	200
		358	438
		296	375
		362	456
		151	229
		242	400
		237	398
		226	384
		243	391
		285	451
		295	397
		217	381
		232	417
		226	372
		236	414
		171	254
		229	365
		169	273
		166	263
		182	257
		273	341
		204	310
		256	399
		196	332
		294	391
		180	289
		181	296
		355	552
		251	351
		235	356
		189	274
		201	322
		174	281
		179	318
		171	289
		222	369
		421	404
		207	335
		188	324
		256	401
		168	286
		167	255
		319	434
		278	449
		222	406
		220	273
		220	321
		358	400
		182	303
		151	202
		180	328
		365	453
		192	260
		161	209
		179	294
		213	314
		188	250
		216	316
		178	297
		212	332
		309	372
		277	346
		187	289
		251	262
		396	450
		261	389
		387	473
		188	295
		207	326
		241	338
		264	321
		241	325
		303	341
		263	385
		232	322
		227	265
		303	398
		303	481
		250	480
		221	366
		198	320
		139	301
		195	342
		203	327
		351	532
		231	349
		227	370
		218	349
		128	299
		183	296
		274	351
		210	337
		214	341
		227	366
		296	372
		185	329
		205	378
		194	334
		171	290
		184	321
		128	346
		298	408
		188	306
		260	412
		261	394
		199	333
		195	357
		222	328
		284	361
		210	342
		209	325
		181	333
		236	382
		271	421
		284	467
		172	354
		171	322
		193	285
		153	288
		175	301
		323	365
		258	337
		197	263
		226	325
		187	347
		197	263
		208	313
		237	322
		230	306
		213	313
		258	356
		250	341
		219	339
		213	328
		222	315
		249	327
		224	288
		309	446
		219	286
		295	442
		238	332
		289	344
		212	278
		193	274
		193	293
		211	321
		203	299
		243	358
		245	348
		224	327
		213	318
		250	349
		240	377
		242	304
		302	282
		239	302
		298	393
		244	344
		510	735
		253	369
		244	350
		389	543
		241	344
		245	339
		266	386
		263	274
		317	368
		237	338
		271	392
		244	356
		251	364
		357	449
		282	384
		246	359
		251	357
		222	380
		234	298
		288	442
		262	376
		258	433
		437	525
		250	303
		443	521
		250	320
		243	375
		214	309
		244	347
		209	309
		330	670
		203	346
		186	319
		257	410
		238	370
		177	229
		239	301
		323	430
		142	432
		394	435
		314	427
		199	339
		196	316
		226	390
		213	335
		211	277
		224	260
		325	449
		206	294
		629	713
		320	431
		205	320
		203	316
		204	326
		171	242
		222	309
		284	470
		190	286
		297	421
		285	431
		310	439
		210	324
		235	253
		210	254
		208	277
		275	386
		292	408
		293	382
		224	330
		193	308
		194	303
		286	453
		276	375
		227	297
		196	259
		399	401
		279	451
		214	294
		332	327
		427	328
		346	570
		272	412
		213	323
		153	409
		209	245
		229	230
		221	414
		328	396
		222	330
		310	508
		212	354
		258	422
		236	362
		301	401
		263	404
		236	302
		210	288
		232	369
		233	409
		542	762
		237	323
		246	335
		234	309
		231	336
		231	365
		246	369
		236	355
		297	452
		277	396
		263	416
		278	454
		361	549
		185	273
		274	443
		498	618
		295	489
		267	391
		288	397
		263	376
		281	380
		254	405
		316	428
		134	455
		271	458
		162	234
		259	404
		245	344
		185	343
		285	394
		488	868
		263	367
		235	328
		359	465
		244	370
		235	307
		305	403
		241	382
		197	265
		215	292
		258	385
		300	400
		171	275
		221	349
		250	375
		300	433
		178	285
		253	448
		167	283
		167	275
		342	508
		264	370
		314	387
		159	246
		374	473
		282	410
		254	382
		376	527
		268	394
		171	213
		269	330
		364	497
		247	349
		315	327
		368	485
		288	389
		263	382
		299	363
		252	387
		306	407
		233	298
		194	259
		206	254
		184	288
		221	334
		220	303
		248	329
		253	317
		270	337
		310	391
		191	264
		182	235
		192	248
		173	255
		181	246
		199	303
		155	203
		211	224
		295	366
		262	398
		188	273
		203	231
		210	244
		318	394
		229	273
		208	255
		168	271
		213	276
		248	329
		213	313
		184	254
		168	222
		262	291
		178	215
		267	389
		193	301
		193	318
		176	260
		271	318
		360	394
		158	331
		188	264
		195	228
		203	266
		368	370
		378	395
		243	317
		173	257
		169	212
		189	237
		310	400
		214	238
		207	267
		223	419
		538	619
		210	283
		328	511
		520	630
		428	505
		367	456
		565	647
		228	252
		177	262
		186	269
		180	269
		193	295
		212	315
		238	345
		188	333
		289	401
		193	226
		168	225
		181	237
		191	370
		175	248
		178	231
		182	286
		175	280
		138	137
		193	297
		175	268
		243	346
		251	361
		232	329
		248	358
		238	366
		173	366
		372	494
		223	362
		257	339
		220	297
		246	352
		244	357
		222	336
		218	327
		242	356
		237	362
		319	464
		138	243
		291	429
		148	255
		198	353
		194	302
		149	260
		202	317
		184	313
		112	238
		246	338
		167	262
		122	293
		271	434
		172	280
		157	351
		230	275
		167	281
		176	254
		365	272
		159	286
		167	594
		422	390
		264	313
		206	393
		172	253
		224	266
		195	287
		165	299
		187	338
		291	422
		204	310
		285	425
		168	312
		427	341
		173	275
		312	447
		174	298
		160	323
		168	322
		194	355
		221	343
		240	304
		744	787
		223	324
		184	354
		189	354
		320	412
		252	449
		194	330
		261	407
		418	569
		288	290
		189	294
		176	346
		169	326
		170	293
		201	298
		181	386
		172	309
		213	206
		176	328
		143	269
		164	317
		148	276
		107	252
		98	261
		144	327
		219	408
		327	424
		247	325
		299	388
		361	442
		460	534
		211	343
		289	399
		312	447
		336	566
		231	360
		204	430
		239	327
		250	334
		229	330
		239	347
		407	518
		297	339
		192	303
		265	372
		317	428
		232	432
		211	305
		123	404
		230	325
		230	364
		238	403
		241	363
		189	350
		245	361
		582	768
		531	664
		251	369
		239	358
		224	358
		296	406
		268	417
		540	598
		317	473
		233	369
		251	390
		258	354
		298	394
		351	436
		242	319
		231	335
		240	319
		263	333
		188	260
		357	484
		192	334
		202	324
		234	412
		208	345
		372	459
		218	326
		212	327
		205	290
		238	246
		199	318
		321	320
		203	316
		217	352
		269	360
		274	438
		308	390
		201	292
		220	313
		236	280
		218	308
		242	374
		195	306
		211	321
		209	356
		244	303
		202	324
		208	310
		268	384
		246	349
		314	376
		213	327
		213	332
		228	342
		397	438
		159	285
		210	307
		317	464
		232	330
		298	496
		276	376
		198	312
		220	363
		295	390
		314	346
		403	536
		409	677
		160	329
		181	357
		136	314
		164	355
		238	454
		161	368
		156	360
		274	358
		276	382
		203	254
		181	262
		205	315
		184	277
		187	289
		183	293
		158	310
		187	288
		179	297
		179	272
		187	281
		200	301
		256	310
		265	378
		265	266
		302	416
		305	315
		291	280
		356	448
		313	303
		292	313
		281	312
		309	386
		322	465
		223	327
		223	179
		256	284
		306	299
		239	245
		238	274
		223	286
		255	259
		334	380
		207	281
		240	315
		245	250
		248	277
		255	268
		240	277
		237	260
		245	263
		252	281
		242	315
		229	283
		239	262
		266	272
		642	706
		440	219
		252	300
		232	290
		239	290
		308	357
		224	288
		352	400
		243	282
		319	412
		339	597
		229	333
		329	353
		240	267
		238	279
		238	273
		246	333
		240	340
		234	310
		254	263
		232	253
		262	325
		214	290
		248	285
		276	314
		210	297
		274	369
		282	383
		191	304
		218	330
		223	336
		200	291
		262	295
		238	306
		206	316
		210	243
		216	277
		212	291
		213	319
		254	326
		186	338
		192	161
		690	824
		232	271
		156	161
		201	277
		196	275
		211	328
		181	267
		210	298
		240	314
		209	310
		214	324
		302	423
		300	435
		272	369
		756	752
		291	342
		226	344
		364	524
		176	312
		308	447
		178	323
		245	350
		321	363
		232	297
		193	267
		233	356
		198	280
		208	303
		252	353
		217	325
		237	345
		232	342
		120	335
		234	306
		233	287
		342	519
		208	277
		277	359
		224	316
		364	412
		290	392
		289	440
		259	357
		259	388
		379	473
		249	389
		300	403
		415	512
		300	435
		226	350
		259	365
		231	335
		253	391
		167	328
		168	353
		141	322
		239	517
		311	312
		150	366
		149	369
		163	282
		208	333
		146	276
		149	289
		146	274
		140	298
		148	314
		150	329
		266	411
		153	324
		208	282
		148	247
		166	234
		149	258
		206	238
		157	298
		296	235
		151	303
		211	355
		178	331
		183	263
		162	251
		180	323
		154	253
		184	296
		164	287
		269	237
		169	316
		148	289
		176	313
		163	286
		291	483
		161	233
		236	345
		298	458
		286	351
		202	339
		162	257
		163	264
		165	305
		231	360
		338	401
		258	376
		425	397
		212	271
		223	301
		200	333
		295	397
		377	358
		337	430
		232	291
		247	267
		266	260
		213	272
		217	273
		217	308
		208	234
		267	364
		313	383
		259	287
		218	325
		229	281
		252	278
		291	331
		228	298
		264	340
		310	388
		303	486
		212	289
		168	302
		382	465
		192	320
		186	302
		189	281
		187	332
		250	393
		199	375
		219	354
		257	357
		250	349
		316	376
		193	281
		166	270
		176	307
		273	373
		204	338
		250	374
		191	342
		180	303
		231	393
		344	465
		332	430
		205	290
		168	288
		186	290
		183	324
		195	307
		282	380
		176	301
		166	274
		215	267
		665	836
		180	254
		212	326
		114	265
		131	322
		118	270
		103	182
		140	211
		129	186
		167	203
		114	222
		127	231
		134	262
		298	366
		187	265
		143	273
		166	226
		274	292
		188	252
		189	231
		142	193
		132	211
		208	221
		170	202
		482	801
		458	484
		122	169
		117	150
		138	191
		135	167
		268	358
		274	335
		147	203
		181	234
		181	217
		121	252
		127	206
		281	404
		147	180
		191	212
		176	196
		166	217
		573	746
		118	181
		324	410
		277	397
		135	197
		155	239
		129	210
		255	351
		219	442
		144	251
		258	354
		134	168
		285	359
		134	164
		146	167
		154	267
		143	212
		89	167
		156	206
		504	565
		131	210
		264	295
		146	137
		308	481
		295	442
		122	179
		148	164
		243	346
		248	353
		236	348
		248	374
		180	438
		302	316
		246	308
		185	284
		180	249
		299	420
		182	278
		245	332
		215	313
		292	427
		229	337
		291	302
		222	359
		197	291
		248	300
		172	261
		318	490
		220	328
		230	334
		144	261
		72	307
		230	324
		352	533
		260	391
		185	327
		265	461
		193	330
		234	359
		210	354
		175	238
		216	309
		201	324
		194	290
		198	300
		237	314
		178	311
		369	532
		161	332
		308	441
		288	290
		258	373
		218	306
		258	374
		204	302
		142	280
		362	304
		199	308
		248	286
		198	295
		283	395
		185	309
		325	416
		309	468
		199	313
		226	353
		190	301
		211	309
		210	296
		210	308
		159	203
		165	197
		164	250
		151	178
		167	196
		209	249
		267	309
		204	233
		291	474
		197	368
		190	291
		193	289
		284	369
		239	427
		196	289
		207	321
		195	407
		199	327
		297	341
		196	306
		159	248
		188	308
		262	358
		156	278
		184	317
		161	466
		191	231
		194	270
		195	290
		178	265
		194	274
		120	368
		146	224
		183	292
		274	781
		224	274
		176	270
		210	290
		197	269
		291	456
		240	314
		297	405
		296	457
		233	338
		337	377
		192	338
		250	422
		181	363
		179	369
		166	354
		266	524
		174	364
		258	510
		208	435
		184	299
		250	330
		205	396
		178	307
		190	327
		194	370
		187	340
		196	381
		221	410
		202	309
		189	274
		207	297
		285	379
		190	311
		182	307
		267	396
		592	818
		339	341
		212	268
		184	293
		181	280
		208	328
		451	297
		180	328
		189	304
		198	314
		335	466
		261	402
		239	292
		181	281
		224	320
		197	301
		249	369
		331	519
		170	216
		223	322
		223	348
		181	270
		265	155
		191	274
		276	426
		192	302
		195	265
		256	441
		151	240
		228	350
		151	238
		219	356
		237	395
		608	920
		239	359
		232	330
		158	255
		246	300
		227	323
		248	377
		279	330
		227	357
		237	370
		205	304
		337	367
		447	611
		232	362
		265	338
		226	310
		232	384
		319	439
		321	729
		244	311
		233	357
		240	332
		245	294
		308	362
		322	388
		260	345
		293	417
		233	337
		246	323
		239	311
		275	358
		197	326
		245	361
		252	377
		142	254
		180	276
		164	307
		286	440
		237	372
		258	322
		361	589
		157	226
		225	337
		242	385
		263	406
		240	334
		229	293
		251	321
		159	255
		193	278
		246	353
		171	247
		183	255
		203	291
		192	288
		225	299
		286	290
		184	256
		197	267
		275	393
		186	292
		193	276
		167	240
		185	267
		294	376
		176	296
		271	361
		186	272
		124	141
		231	311
		299	420
		253	251
		124	55
		134	245
		286	454
		161	325
		228	349
		139	202
		302	431
		143	270
		240	375
		163	297
		134	291
		152	295
		537	556
		185	272
		150	232
		155	194
		372	459
		169	260
		215	353
		117	241
		130	255
		172	302
		137	293
		252	420
		154	301
		246	310
		280	381
		312	371
		128	197
		130	216
		87	171
		200	319
		168	246
		128	286
		225	288
		191	351
		243	350
		242	352
		317	409
		312	441
		233	349
		269	416
		258	380
		252	335
		336	465
		243	359
		257	352
		242	342
		241	329
		248	363
		143	215
		157	220
		323	556
		253	372
		242	350
		241	360
		255	359
		153	244
		265	363
		171	238
		325	487
		176	245
		325	595
		202	240
		193	261
		178	241
		191	306
		186	280
		260	396
		213	316
		275	394
		207	304
		247	380
		209	341
		244	403
		214	318
		194	348
		226	374
		289	462
		256	375
		209	316
		225	201
		211	351
		298	399
		321	429
		193	312
		290	389
		327	460
		164	258
		152	301
		155	261
		152	230
		184	289
		206	390
		172	375
		208	351
		209	340
		173	325
		209	357
		271	372
		277	389
		135	318
		246	393
		164	294
		209	293
		162	326
		200	349
		263	353
		394	585
		185	326
		183	335
		209	335
		171	310
		147	333
		210	346
		179	350
		296	376
		224	374
		186	347
		215	337
		194	330
[truncated: 2,574 more rows]
