# Supplementary material for: Metabolic regulation of misfolded protein import into mitochondria
Source: eLife. 2024 Jun 20;12:RP87518. doi: 10.7554/eLife.87518 (PMC11189628; doi:10.7554/eLife.87518)
Supplement: Figure 1—figure supplement 2—source data 1. [file elife-87518-fig1-figsupp2-data1.xlsx]

## Sheet: Sheet1
	Fig. 1-Figure Supplement 2C
			Mean spGFP intensity
		Time(min)	Estradiol			EtOH
		0	0.000115	0.000105	0.000141	1.49e-05	2.38e-05	2.36e-05
		45	0.000366	0.000512	0.001018	2.56e-05	1.93e-05	2.41e-05
		90	0.003784	0.003493	0.004338	3.15e-05	2.52e-05	1.81e-05
	Fig. 1-Figure Supplement 2E
			Normalized spGFP intensity
			FlucWT	FlucSM	FlucDM
			0.577778	0.664883	1.48079
			0.776258	0.710162	1.28109
			0.716568	1.29288	1.49237
			0.5831	1.33208	1.37986
	Fig. 1-Figure Supplement 2G
			Mean FlucSM spGFP intensity
			HG	LG	LG-Gly
			0.00373796	0.000615	0.001014
			0.00341228	0.00059	0.000688
			0.00347999	0.000466	0.00091
	Fig. 1-Figure Supplement 2I
			Normalized nuclear/cyto Mig1-GFP ratio
			HG	HG	LG	LG-Gly
			REG1	Δreg1	REG1	REG1
			0.940563	0.378329	0.343609	0.406955
			1.14889	0.340695	0.352313	0.621891
			0.910549	0.397913	0.398656	0.421225
