# Supplementary material for: Metabolic regulation of misfolded protein import into mitochondria
Source: eLife. 2024 Jun 20;12:RP87518. doi: 10.7554/eLife.87518 (PMC11189628; doi:10.7554/eLife.87518)
Supplement: Figure 1—figure supplement 3—source data 1. [file elife-87518-fig1-figsupp3-data1.xlsx]

## Sheet: Sheet1
	Fig. 1-Figure Supplement 3B
			Normalized Grx5 spGFP intensity
			HG	LG
			1.07896	0.760591
			0.929388	0.778449
			0.991651	0.688143
	Fig. 1-Figure Supplement 3C
			Normalized mCherry-GFP1-10 intensity
			HG	LG
			1.05652	0.774418
			0.974817	0.817271
			0.968661	0.821764
	Fig. 1-Figure Supplement 3D
			Normalized Grx5 spGFP/mCherry ratio
			HG	LG
			1.02093	0.969906
			0.95263	0.940239
			1.02644	0.813302
