# Supplementary material for: Metabolic regulation of misfolded protein import into mitochondria
Source: eLife. 2024 Jun 20;12:RP87518. doi: 10.7554/eLife.87518 (PMC11189628; doi:10.7554/eLife.87518)
Supplement: Figure 1—source data 1. [file elife-87518-fig1-data1.xlsx]

## Sheet: Figure 1
	Fig. 1D	Mean spGFP/mCherry
		SNF1	Δsnf1
		0.001162	0.00649
		0.001324	0.005614
		0.002389	0.005648
	Fig. 1F	Mean spGFP/mCherry
		Δltv1	Δltv1	LTV1	LTV1
		30°C	HS	30°C	HS
		0.000189	0.000151	0.002139	0.00742828
		0.000142	0.000154	0.001023	0.0102141
		0.000111	0.000193	0.00112	0.00887616
	Fig. 1H	Mean spGFP intensity
		HG	HG	LG
		REG1	Δreg1	REG1
		0.003744	0.000385	0.00102013
		0.003263	0.000537	0.000680019
		0.003834	0.000554	0.000539083
			0.0003
	Fig. 1K	Mean FlucDM spGFP intensity
		DMSO	Dorsomorphin
		17208	22068
		12728	16925
		23742	30219
		26200	32590
		26374	30607
	Fig. 1L	Mean GST spGFP intensity
		DMSO	Dorsomorphin
		5319	5494
		3427	3148
		6783	5925
		6310	4842
		7020	5243
	Fig. 1M	Mean FlucDM spGFP intensity
		DMSO	AICAR
		30227	13281
		28715	12737
		28784	14001
		32188	8712
		31023	11238
		32664	9947
		19727	12532
		17019	12325
		18392	11855
