# Supplementary material for: Metabolic regulation of misfolded protein import into mitochondria
Source: eLife. 2024 Jun 20;12:RP87518. doi: 10.7554/eLife.87518 (PMC11189628; doi:10.7554/eLife.87518)
Supplement: Figure 2—figure supplement 1—source data 1. [file elife-87518-fig2-figsupp1-data1.xlsx]

## Sheet: Sheet1
	Fig 2-Figure Supplement 1B
		Mean FlucSM spGFP intensity
		Control	Δatg1	Δatg15
		0.000310254	0.00034	0.000878
		0.00017221	0.000437	0.000956
		0.000716022	0.000889	0.000619
			0.000693	0.00033
	Fig 2-Figure Supplement 1C
		Normalized FlucSM spGFP intensity
		HG	HG	LG	LG
		DMSO	MG132	DMSO	MG132
		1.16025	1.41613	0.078248	0.343579
		0.94548	1.65217	0.157226	0.511
		0.894272	1.60952	0.149292	0.483891
	Fig 2-Figure Supplement 1E
		Mean FlucSM spGFP intensity
		MIG1 MIG2	Δmig1	Δmig2	Δmig1Δmig2
		0.003419	0.002902	0.004144	0.002221
		0.002896	0.003334	0.005402	0.003455
		0.003415	0.002379	0.003427	0.002552
			0.003234	0.003514	0.002991
	Fig 2-Figure Supplement 1H
		Normalized FlucSM spGFP intensity
		HG	HG	LG	LG
		WT	Δhap4	WT	Δhap4
		1.0361	0.940905	0.126702	0.442547
		0.903006	0.983894	0.116574	0.672726
		1.0609	0.900216	0.151489	0.646636
			0.853676		0.634914
	Fig 2-Figure Supplement 1G
		Mean FlucSM spGFP intensity
		Δreg1	Δadr1Δreg1	Δcat8Δreg1	Δsip4Δreg1	Δrds2Δreg1
		0.001275	0.000583	0.000503	0.000709	0.000739
		0.000641	0.001123	0.000737	0.000611	0.000467
		0.000807	0.000807	0.00043	0.000695	0.0005
			0.001046	0.000568	0.000295	0.000426
