# Supplementary material for: Metabolic regulation of misfolded protein import into mitochondria
Source: eLife. 2024 Jun 20;12:RP87518. doi: 10.7554/eLife.87518 (PMC11189628; doi:10.7554/eLife.87518)
Supplement: Figure 2—source data 1. [file elife-87518-fig2-data1.xlsx]

## Sheet: Sheet1
	Fig 2C
		Mean FlucSM spGFP intensity
		HG	HG	HG	HG	LG	LG
		REG1	REG1	Δreg1	Δreg1	REG1	REG1
		PIM1	pim1-S974D	PIM1	pim1-S974D	PIM1	pim1-S974D
		0.000588	0.002868	0.000226	0.000137	0.000147299	5.7e-05
		0.000479	0.001827	0.000299	0.000222	6.4789e-05	4.31e-05
		0.000688	0.001993	7.86e-05	0.00011	5.26954e-05	6.16e-05
	Fig 2D
		Normalized luciferase activity
		HG	HG	LG	LG-Gly
		REG1	Δreg1	REG1	REG1
		0.978923	0.591982	0.56913	0.531383
		1.0161	0.501668	0.528889	0.636816
		1.00498	0.556595	0.601133	0.564049
			0.553053
			0.519442
	Fig 2G
		Mean FlucSM spGFP intensity
			Δreg1	Δreg1Δhap4
			0.000374624	0.001884
			0.000480814	0.00129
			0.000260339	0.001966
				0.002358
				0.00157
	Fig 2I
		Mean FlucSM spGFP intensity
			Control	HAP4 overexpression
			0.00371	0.002645
			0.004333	0.002211
			0.00488	0.002103
