# Supplementary material for: Metabolic regulation of misfolded protein import into mitochondria
Source: eLife. 2024 Jun 20;12:RP87518. doi: 10.7554/eLife.87518 (PMC11189628; doi:10.7554/eLife.87518)
Supplement: Figure 3—figure supplement 1—source data 1. [file elife-87518-fig3-figsupp1-data1.xlsx]

## Sheet: Sheet1
	Fig 3-Figure Supplement 1C
		Normalized FlucSM spGFP intensity
		Control	Tom70cd
		1.29489	1.70178
		0.83893	2.96318
		0.866176	2.86984
			2.23355
	Fig 3-Figure Supplement 1G
		Mean FlucSM spGFP intensity
		TOM6	Δtom6
		0.001375	0.003724
		0.002232	0.003708
		0.000847	0.003569
