# Supplementary material for: Metabolic regulation of misfolded protein import into mitochondria
Source: eLife. 2024 Jun 20;12:RP87518. doi: 10.7554/eLife.87518 (PMC11189628; doi:10.7554/eLife.87518)
Supplement: Figure 3—source data 1. [file elife-87518-fig3-data1.xlsx]

## Sheet: Sheet1
	Fig 3A
	Data below was retrieved from reference (35): M. Morgenstern, S. B. Stiller, P. Lübbert, C. D. Peikert, S. Dannenmaier, F. Drepper, U. Weill, P. Höß, R. Feuerstein, M. Gebert, M. Bohnert, M. van der Laan, M. Schuldiner, C. Schütze, S. Oeljeklaus, N. Pfanner, N. Wiedemann, B. Warscheid, Definition of a High-Confidence Mitochondrial Proteome at Quantitative Scale. Cell Rep. 19, 2836–2852 (2017). ht…
			Fold change (galactose/glucose)	Fold change (glycerol/glucose)
		POR1	3.15312	2.80827
		TOM40	1.04583	1.09732
		TOM5	1.21122	1.13833
		TOM22	0.891409	0.912129
		TOM70	0.959281	0.97783
		OM45	1.86088	9.08371
		TOM7	1.19825	1.08286
		OM14	2.21992	6.60857
		TOM6	1.03241	0.748987
		TOM20	1.10063	0.925384
		TOM71	0.704889	0.868
	Fig 3C
		Mean FlucSM spGFP intensity
		Control	Tom20cd	Tom22cd	Tom70cd	Tom70cd (Δ98-214)	Tom70cd (Δ247-617)
		0.000296	0.000307	0.000332	0.005497	0.000594	0.000477
		0.00076	0.000119	0.000172	0.006897	0.000765	0.000235
		0.000478	0.000447	0.000715	0.007916	0.000495	0.000548
			0.000585	0.000104		0.000321	0.00075
	Fig 3E
		Normalized FlucSM spGFP intensity
		Control	Δtom70	Δtom71	Δtom70Δtom71
		1.01719	1.22205	1.29153	1.63645
		0.74275	0.728499	1.29136	1.5359
		1.24006	0.942377	1.18112	1.82458
	Fig 3G
		Normalized FlucSM spGFP intensity
		+Tom70cd	Tom70cd Δtom6
		0.79604	1.31427
		1.12875	1.51955
		0.920724	1.55228
		1.15448	1.47261
