# Supplementary material for: Metabolic regulation of misfolded protein import into mitochondria
Source: eLife. 2024 Jun 20;12:RP87518. doi: 10.7554/eLife.87518 (PMC11189628; doi:10.7554/eLife.87518)
Supplement: Figure 4—figure supplement 1—source data 1. [file elife-87518-fig4-figsupp1-data1.xlsx]

## Sheet: A
	Fig 4-Figure Supplement 1A
			OD600
		Time(hr)	HG+EtOH			HG+Estradiol			LG+EtOH			LG+Estradiol
		0	0.12	0.123	0.122	0.118	0.121	0.124	0.113	0.117	0.117	0.117	0.121	0.119
		0.333333	0.123	0.126	0.127	0.124	0.125	0.13	0.117	0.119	0.119	0.12	0.123	0.118
		0.666667	0.129	0.13	0.132	0.131	0.132	0.137	0.118	0.119	0.119	0.122	0.125	0.12
		1	0.136	0.136	0.14	0.138	0.14	0.145	0.12	0.123	0.123	0.125	0.129	0.125
		1.33333	0.143	0.143	0.149	0.148	0.148	0.155	0.124	0.129	0.13	0.133	0.136	0.13
		1.66667	0.15	0.149	0.158	0.158	0.158	0.166	0.128	0.137	0.137	0.139	0.143	0.138
		2	0.159	0.157	0.17	0.172	0.171	0.18	0.133	0.145	0.146	0.148	0.154	0.147
		2.33333	0.17	0.167	0.184	0.186	0.185	0.194	0.141	0.156	0.158	0.159	0.165	0.157
		2.66667	0.183	0.176	0.198	0.201	0.201	0.208	0.148	0.168	0.17	0.17	0.177	0.168
		3	0.196	0.187	0.215	0.218	0.216	0.223	0.158	0.181	0.184	0.184	0.191	0.18
		3.33333	0.211	0.201	0.233	0.234	0.232	0.238	0.169	0.196	0.199	0.197	0.207	0.195
		3.66667	0.229	0.217	0.254	0.251	0.249	0.255	0.182	0.213	0.216	0.213	0.222	0.21
		4	0.247	0.233	0.277	0.271	0.266	0.274	0.197	0.232	0.236	0.23	0.238	0.226
		4.33333	0.269	0.252	0.305	0.294	0.287	0.296	0.214	0.25	0.256	0.247	0.257	0.242
		4.66667	0.295	0.275	0.336	0.319	0.31	0.321	0.231	0.274	0.279	0.266	0.277	0.264
		5	0.324	0.3	0.372	0.345	0.336	0.349	0.251	0.299	0.305	0.287	0.3	0.284
		5.33333	0.359	0.33	0.413	0.375	0.364	0.377	0.272	0.326	0.331	0.31	0.324	0.308
		5.66667	0.396	0.365	0.458	0.407	0.395	0.408	0.293	0.351	0.358	0.332	0.348	0.33
		6	0.439	0.402	0.509	0.443	0.43	0.445	0.314	0.376	0.383	0.354	0.369	0.352
		6.33333	0.485	0.445	0.564	0.481	0.467	0.484	0.335	0.399	0.406	0.374	0.389	0.372
		6.66667	0.537	0.493	0.624	0.523	0.506	0.527	0.355	0.419	0.424	0.392	0.406	0.391
		7	0.593	0.545	0.688	0.567	0.55	0.574	0.373	0.435	0.44	0.407	0.421	0.405
		7.33333	0.654	0.599	0.753	0.615	0.597	0.623	0.389	0.448	0.453	0.42	0.431	0.416
		7.66667	0.715	0.661	0.825	0.666	0.644	0.675	0.402	0.461	0.463	0.43	0.441	0.425
		8	0.782	0.725	0.897	0.718	0.697	0.729	0.414	0.47	0.471	0.439	0.448	0.433
		8.33333	0.853	0.791	0.972	0.772	0.75	0.786	0.424	0.479	0.479	0.448	0.455	0.44
		8.66667	0.923	0.859	1.048	0.83	0.805	0.842	0.431	0.485	0.482	0.453	0.46	0.448
		9	0.996	0.932	1.123	0.885	0.861	0.901	0.44	0.49	0.488	0.459	0.465	0.453
		9.33333	1.071	1.005	1.198	0.946	0.918	0.963	0.447	0.495	0.493	0.464	0.47	0.458
		9.66667	1.145	1.078	1.273	1.003	0.977	1.024	0.453	0.499	0.497	0.468	0.474	0.462
		10	1.218	1.152	1.347	1.063	1.036	1.085	0.458	0.502	0.5	0.472	0.477	0.465
		10.3333	1.29	1.229	1.417	1.121	1.095	1.146	0.463	0.506	0.504	0.476	0.481	0.468
		10.6667	1.36	1.303	1.486	1.182	1.154	1.209	0.468	0.509	0.506	0.479	0.484	0.472
		11	1.429	1.373	1.552	1.243	1.213	1.269	0.47	0.511	0.509	0.483	0.487	0.475
		11.3333	1.496	1.441	1.614	1.302	1.271	1.329	0.474	0.514	0.511	0.485	0.49	0.478
		11.6667	1.558	1.506	1.673	1.359	1.33	1.39	0.477	0.516	0.513	0.488	0.492	0.481
		12	1.619	1.568	1.73	1.415	1.387	1.447	0.48	0.519	0.515	0.491	0.495	0.483
		12.3333	1.674	1.628	1.778	1.471	1.443	1.505	0.482	0.52	0.516	0.493	0.497	0.486
		12.6667	1.722	1.68	1.816	1.526	1.497	1.561	0.484	0.522	0.518	0.496	0.5	0.489
		13	1.754	1.714	1.842	1.579	1.55	1.611	0.486	0.524	0.519	0.498	0.502	0.49
		13.3333	1.775	1.739	1.86	1.629	1.602	1.659	0.488	0.525	0.521	0.5	0.504	0.493
		13.6667	1.79	1.754	1.874	1.675	1.648	1.703	0.49	0.527	0.523	0.503	0.506	0.496
		14	1.798	1.765	1.884	1.72	1.693	1.738	0.493	0.529	0.524	0.505	0.508	0.497
		14.3333	1.803	1.77	1.89	1.76	1.734	1.767	0.495	0.53	0.526	0.507	0.509	0.5
		14.6667	1.807	1.774	1.895	1.795	1.773	1.787	0.496	0.531	0.526	0.509	0.512	0.5
		15	1.809	1.777	1.898	1.823	1.803	1.802	0.498	0.532	0.528	0.511	0.514	0.502
		15.3333	1.811	1.779	1.902	1.843	1.825	1.814	0.5	0.534	0.53	0.513	0.516	0.504
		15.6667	1.812	1.779	1.904	1.86	1.844	1.822	0.501	0.536	0.53	0.514	0.517	0.505
		16	1.814	1.781	1.906	1.872	1.856	1.828	0.503	0.536	0.531	0.515	0.519	0.507
		16.3333	1.817	1.781	1.908	1.882	1.865	1.833	0.505	0.538	0.533	0.517	0.52	0.509
		16.6667	1.818	1.782	1.909	1.888	1.872	1.836	0.507	0.538	0.534	0.519	0.522	0.511
		17	1.819	1.782	1.91	1.893	1.878	1.839	0.509	0.54	0.534	0.52	0.524	0.513
		17.3333	1.821	1.782	1.911	1.897	1.882	1.841	0.51	0.541	0.536	0.521	0.525	0.514
		17.6667	1.822	1.784	1.912	1.9	1.885	1.843	0.512	0.543	0.537	0.522	0.526	0.515
		18	1.824	1.785	1.913	1.902	1.888	1.845	0.514	0.544	0.538	0.523	0.527	0.517
		18.3333	1.825	1.786	1.914	1.905	1.89	1.847	0.516	0.545	0.539	0.525	0.53	0.518
		18.6667	1.827	1.787	1.914	1.908	1.892	1.848	0.517	0.547	0.54	0.526	0.531	0.519
		19	1.827	1.789	1.915	1.909	1.894	1.849	0.519	0.547	0.542	0.528	0.533	0.521
		19.3333	1.828	1.789	1.916	1.911	1.896	1.851	0.52	0.549	0.542	0.529	0.533	0.522
		19.6667	1.829	1.79	1.917	1.911	1.898	1.852	0.522	0.55	0.544	0.53	0.535	0.523
		20	1.829	1.791	1.917	1.914	1.899	1.853	0.523	0.551	0.545	0.531	0.536	0.524
		20.3333	1.831	1.792	1.918	1.915	1.901	1.855	0.525	0.553	0.548	0.533	0.537	0.527
		20.6667	1.832	1.793	1.919	1.916	1.902	1.855	0.527	0.554	0.548	0.534	0.538	0.527
		21	1.833	1.795	1.919	1.918	1.905	1.857	0.529	0.556	0.55	0.535	0.539	0.529
		21.3333	1.834	1.795	1.92	1.92	1.906	1.858	0.531	0.558	0.551	0.537	0.541	0.53
		21.6667	1.835	1.797	1.921	1.92	1.908	1.858	0.532	0.559	0.552	0.539	0.543	0.531
		22	1.836	1.798	1.921	1.921	1.909	1.859	0.534	0.561	0.554	0.54	0.544	0.533
		22.3333	1.837	1.799	1.922	1.922	1.911	1.861	0.535	0.562	0.554	0.541	0.546	0.535
		22.6667	1.837	1.799	1.922	1.924	1.912	1.861	0.537	0.564	0.555	0.542	0.547	0.536
		23	1.837	1.8	1.923	1.925	1.913	1.862	0.539	0.565	0.557	0.544	0.548	0.538
		23.3333	1.838	1.8	1.923	1.926	1.915	1.863	0.54	0.566	0.559	0.544	0.55	0.539
		23.6667	1.839	1.802	1.923	1.927	1.916	1.864	0.542	0.568	0.56	0.546	0.551	0.541
									0.544	0.57	0.561	0.548	0.553	0.543
									0.546	0.572	0.563	0.549	0.555	0.545
									0.548	0.573	0.564	0.55	0.557	0.547
									0.55	0.574	0.566	0.551	0.558	0.547
									0.552	0.576	0.567	0.553	0.56	0.548
									0.553	0.577	0.569	0.555	0.561	0.55
									0.556	0.579	0.57	0.556	0.563	0.552
									0.558	0.58	0.57	0.557	0.563	0.552
									0.56	0.581	0.572	0.558	0.566	0.554
									0.561	0.583	0.574	0.559	0.568	0.556
									0.563	0.584	0.575	0.56	0.569	0.556
									0.565	0.586	0.577	0.563	0.57	0.559
									0.567	0.587	0.578	0.563	0.571	0.56
									0.569	0.588	0.579	0.565	0.573	0.562
									0.57	0.59	0.581	0.566	0.575	0.563
									0.572	0.592	0.582	0.567	0.576	0.565
									0.574	0.594	0.584	0.568	0.577	0.566
									0.576	0.594	0.585	0.569	0.578	0.568
									0.578	0.596	0.587	0.571	0.58	0.569
									0.579	0.598	0.588	0.573	0.58	0.57
									0.582	0.599	0.59	0.574	0.582	0.572
									0.584	0.601	0.591	0.575	0.583	0.572
									0.585	0.603	0.593	0.576	0.585	0.574
									0.587	0.605	0.595	0.578	0.586	0.575
									0.589	0.606	0.596	0.579	0.589	0.578
									0.591	0.607	0.597	0.58	0.59	0.579
									0.591	0.609	0.598	0.582	0.591	0.58
									0.593	0.611	0.6	0.583	0.592	0.582
									0.595	0.612	0.601	0.584	0.593	0.583
									0.597	0.614	0.603	0.585	0.595	0.585
									0.598	0.616	0.604	0.586	0.596	0.587
									0.6	0.617	0.605	0.588	0.597	0.587
									0.601	0.618	0.606	0.588	0.599	0.588
									0.603	0.62	0.607	0.589	0.599	0.589
									0.605	0.621	0.61	0.59	0.601	0.592
									0.606	0.622	0.61	0.592	0.602	0.592
									0.608	0.624	0.611	0.593	0.604	0.594
									0.609	0.625	0.614	0.594	0.605	0.594
									0.611	0.627	0.614	0.595	0.606	0.596
									0.612	0.628	0.616	0.596	0.608	0.597
									0.613	0.629	0.617	0.597	0.609	0.599
									0.615	0.631	0.618	0.598	0.61	0.6
									0.617	0.632	0.62	0.598	0.611	0.601
									0.618	0.633	0.62	0.6	0.611	0.6
									0.62	0.634	0.621	0.601	0.614	0.602
									0.622	0.636	0.623	0.602	0.615	0.604
									0.624	0.636	0.624	0.603	0.615	0.605
									0.626	0.638	0.625	0.602	0.616	0.605
									0.627	0.639	0.626	0.604	0.617	0.607
									0.629	0.641	0.626	0.605	0.618	0.607
									0.63	0.641	0.628	0.606	0.62	0.608
									0.631	0.643	0.63	0.607	0.621	0.609
									0.633	0.644	0.631	0.608	0.622	0.611
									0.634	0.645	0.632	0.608	0.623	0.61
									0.636	0.646	0.633	0.61	0.624	0.612
									0.637	0.648	0.634	0.61	0.623	0.613
									0.638	0.649	0.635	0.612	0.625	0.614
									0.64	0.649	0.635	0.613	0.627	0.615
									0.641	0.65	0.636	0.614	0.627	0.616
									0.642	0.652	0.637	0.615	0.628	0.616
									0.644	0.653	0.638	0.615	0.629	0.617

## Sheet: B
	Fig 4-Figure Supplement 1B
			OD600
		Time(hr)	HG+EtOH				HG+Estradiol				LG+EtOH				LG+Estradiol
		0	0.127	0.129	0.128	0.128	0.129	0.133	0.133	0.129	0.113	0.115	0.116	0.116	0.12	0.116	0.115	0.115
		0.333333	0.132	0.133	0.132	0.132	0.133	0.137	0.138	0.133	0.117	0.118	0.117	0.117	0.122	0.117	0.116	0.117
		0.666667	0.137	0.138	0.135	0.136	0.14	0.143	0.145	0.139	0.118	0.118	0.117	0.118	0.124	0.118	0.118	0.12
		1	0.141	0.144	0.14	0.141	0.146	0.151	0.152	0.145	0.12	0.121	0.119	0.12	0.127	0.121	0.122	0.125
		1.33333	0.146	0.15	0.144	0.146	0.155	0.16	0.16	0.152	0.123	0.125	0.123	0.123	0.132	0.125	0.127	0.131
		1.66667	0.15	0.154	0.151	0.152	0.164	0.17	0.17	0.159	0.126	0.13	0.127	0.128	0.139	0.13	0.133	0.138
		2	0.156	0.161	0.158	0.16	0.175	0.181	0.181	0.169	0.131	0.136	0.133	0.133	0.146	0.137	0.141	0.148
		2.33333	0.162	0.168	0.166	0.168	0.185	0.194	0.192	0.179	0.137	0.144	0.141	0.141	0.156	0.144	0.149	0.156
		2.66667	0.172	0.177	0.174	0.178	0.198	0.206	0.206	0.192	0.143	0.152	0.15	0.149	0.166	0.152	0.158	0.167
		3	0.181	0.187	0.186	0.189	0.21	0.22	0.221	0.204	0.151	0.162	0.16	0.16	0.178	0.162	0.168	0.18
		3.33333	0.193	0.202	0.198	0.202	0.223	0.235	0.235	0.217	0.161	0.173	0.174	0.172	0.191	0.175	0.181	0.193
		3.66667	0.207	0.218	0.211	0.215	0.237	0.251	0.252	0.23	0.172	0.188	0.188	0.186	0.205	0.187	0.194	0.207
		4	0.224	0.237	0.226	0.231	0.252	0.27	0.27	0.244	0.187	0.204	0.204	0.202	0.219	0.2	0.206	0.221
		4.33333	0.243	0.257	0.245	0.249	0.27	0.291	0.292	0.261	0.201	0.221	0.222	0.217	0.234	0.213	0.22	0.237
		4.66667	0.264	0.281	0.267	0.27	0.29	0.314	0.315	0.278	0.219	0.238	0.242	0.235	0.251	0.229	0.237	0.254
		5	0.288	0.307	0.29	0.292	0.313	0.34	0.341	0.3	0.238	0.259	0.262	0.256	0.269	0.245	0.251	0.272
		5.33333	0.314	0.338	0.319	0.321	0.337	0.366	0.369	0.322	0.259	0.282	0.285	0.277	0.289	0.261	0.268	0.291
		5.66667	0.345	0.373	0.349	0.352	0.364	0.396	0.4	0.347	0.281	0.305	0.309	0.3	0.305	0.277	0.286	0.31
		6	0.379	0.41	0.383	0.386	0.393	0.428	0.433	0.373	0.302	0.328	0.332	0.323	0.323	0.294	0.303	0.33
		6.33333	0.417	0.453	0.425	0.426	0.423	0.462	0.468	0.401	0.325	0.349	0.355	0.347	0.342	0.312	0.319	0.347
		6.66667	0.457	0.5	0.466	0.468	0.456	0.497	0.505	0.43	0.346	0.37	0.377	0.368	0.357	0.327	0.336	0.364
		7	0.505	0.549	0.515	0.517	0.489	0.535	0.543	0.462	0.368	0.389	0.396	0.388	0.372	0.341	0.35	0.38
		7.33333	0.555	0.605	0.568	0.567	0.526	0.576	0.585	0.496	0.386	0.405	0.413	0.406	0.385	0.354	0.362	0.39
		7.66667	0.609	0.662	0.621	0.622	0.564	0.618	0.629	0.534	0.401	0.419	0.427	0.418	0.395	0.366	0.373	0.402
		8	0.665	0.726	0.679	0.681	0.603	0.66	0.673	0.572	0.414	0.43	0.438	0.43	0.404	0.375	0.382	0.41
		8.33333	0.727	0.789	0.744	0.742	0.645	0.707	0.72	0.61	0.426	0.441	0.448	0.438	0.41	0.384	0.391	0.418
		8.66667	0.79	0.856	0.81	0.806	0.689	0.753	0.768	0.653	0.436	0.448	0.457	0.447	0.417	0.391	0.397	0.424
		9	0.857	0.927	0.879	0.873	0.734	0.801	0.82	0.696	0.445	0.456	0.464	0.454	0.423	0.398	0.402	0.43
		9.33333	0.922	0.995	0.949	0.943	0.779	0.847	0.866	0.739	0.453	0.462	0.47	0.459	0.428	0.405	0.409	0.434
		9.66667	0.991	1.069	1.023	1.013	0.826	0.898	0.918	0.784	0.459	0.467	0.475	0.463	0.434	0.409	0.412	0.439
		10	1.063	1.138	1.091	1.085	0.872	0.946	0.97	0.831	0.465	0.472	0.479	0.468	0.436	0.412	0.417	0.443
		10.3333	1.132	1.212	1.166	1.157	0.92	0.998	1.021	0.88	0.47	0.476	0.483	0.471	0.441	0.417	0.421	0.446
		10.6667	1.202	1.284	1.24	1.229	0.97	1.048	1.073	0.927	0.474	0.48	0.486	0.474	0.444	0.419	0.425	0.451
		11	1.274	1.352	1.31	1.301	1.018	1.099	1.126	0.975	0.478	0.484	0.489	0.479	0.447	0.422	0.429	0.454
		11.3333	1.34	1.421	1.382	1.372	1.068	1.15	1.177	1.024	0.481	0.487	0.491	0.48	0.45	0.427	0.431	0.457
		11.6667	1.409	1.484	1.448	1.44	1.117	1.201	1.23	1.073	0.484	0.489	0.494	0.483	0.454	0.43	0.435	0.459
		12	1.474	1.549	1.513	1.505	1.169	1.249	1.281	1.123	0.487	0.491	0.496	0.485	0.456	0.433	0.438	0.463
		12.3333	1.534	1.607	1.577	1.569	1.219	1.3	1.33	1.174	0.49	0.493	0.498	0.487	0.459	0.435	0.442	0.465
		12.6667	1.592	1.664	1.634	1.626	1.268	1.347	1.38	1.223	0.493	0.496	0.501	0.489	0.462	0.438	0.444	0.468
		13	1.649	1.712	1.689	1.683	1.316	1.395	1.427	1.27	0.496	0.498	0.502	0.491	0.463	0.441	0.445	0.471
		13.3333	1.701	1.75	1.731	1.729	1.362	1.441	1.473	1.317	0.498	0.499	0.504	0.492	0.467	0.444	0.45	0.475
		13.6667	1.742	1.774	1.761	1.766	1.411	1.486	1.52	1.368	0.5	0.501	0.506	0.495	0.469	0.446	0.453	0.476
		14	1.77	1.788	1.779	1.787	1.456	1.532	1.563	1.411	0.503	0.503	0.508	0.496	0.471	0.449	0.454	0.479
		14.3333	1.788	1.799	1.79	1.802	1.502	1.572	1.605	1.458	0.505	0.504	0.509	0.498	0.474	0.453	0.456	0.481
		14.6667	1.801	1.806	1.8	1.814	1.544	1.613	1.647	1.503	0.506	0.506	0.51	0.499	0.477	0.454	0.459	0.484
		15	1.809	1.81	1.803	1.819	1.583	1.651	1.682	1.541	0.508	0.508	0.512	0.5	0.479	0.457	0.462	0.487
		15.3333	1.814	1.814	1.809	1.824	1.624	1.688	1.718	1.583	0.51	0.509	0.512	0.501	0.481	0.46	0.464	0.488
		15.6667	1.817	1.817	1.813	1.829	1.663	1.718	1.746	1.621	0.512	0.511	0.513	0.503	0.483	0.462	0.467	0.491
		16	1.821	1.819	1.815	1.831	1.697	1.743	1.769	1.66	0.514	0.512	0.514	0.505	0.486	0.464	0.469	0.493
		16.3333	1.823	1.82	1.815	1.831	1.73	1.761	1.785	1.693	0.516	0.514	0.516	0.506	0.488	0.468	0.471	0.496
		16.6667	1.825	1.821	1.816	1.834	1.757	1.773	1.795	1.718	0.517	0.515	0.518	0.508	0.49	0.47	0.473	0.498
		17	1.826	1.822	1.817	1.834	1.777	1.782	1.803	1.739	0.52	0.518	0.519	0.509	0.492	0.473	0.476	0.5
		17.3333	1.827	1.823	1.819	1.837	1.793	1.788	1.808	1.754	0.521	0.519	0.52	0.51	0.495	0.475	0.478	0.502
		17.6667	1.828	1.824	1.82	1.837	1.805	1.791	1.812	1.765	0.523	0.52	0.522	0.512	0.496	0.477	0.48	0.505
		18	1.829	1.825	1.822	1.838	1.812	1.795	1.814	1.77	0.525	0.52	0.524	0.513	0.498	0.478	0.484	0.507
		18.3333	1.829	1.825	1.821	1.839	1.817	1.796	1.814	1.773	0.526	0.522	0.525	0.514	0.5	0.48	0.486	0.508
		18.6667	1.831	1.827	1.82	1.84	1.821	1.799	1.817	1.777	0.528	0.524	0.526	0.516	0.502	0.483	0.487	0.511
		19	1.831	1.826	1.822	1.84	1.823	1.8	1.818	1.779	0.53	0.525	0.527	0.516	0.503	0.485	0.489	0.514
		19.3333	1.833	1.828	1.823	1.841	1.827	1.801	1.819	1.781	0.532	0.527	0.529	0.518	0.506	0.488	0.492	0.515
		19.6667	1.833	1.829	1.824	1.842	1.829	1.801	1.82	1.782	0.535	0.529	0.53	0.519	0.507	0.488	0.494	0.517
		20	1.833	1.829	1.824	1.842	1.829	1.803	1.821	1.784	0.537	0.53	0.532	0.521	0.508	0.49	0.495	0.518
		20.3333	1.837	1.837	1.836	1.85	1.84	1.803	1.827	1.792	0.538	0.532	0.533	0.523	0.51	0.493	0.498	0.521
		20.6667	1.838	1.836	1.836	1.85	1.842	1.804	1.826	1.791	0.54	0.533	0.534	0.524	0.511	0.494	0.5	0.522
		21	1.838	1.838	1.836	1.851	1.842	1.805	1.827	1.791	0.542	0.534	0.536	0.525	0.514	0.497	0.501	0.524
		21.3333	1.839	1.839	1.835	1.851	1.843	1.805	1.828	1.793	0.544	0.536	0.537	0.526	0.516	0.498	0.503	0.526
		21.6667	1.84	1.84	1.838	1.852	1.844	1.806	1.829	1.794	0.545	0.537	0.539	0.528	0.516	0.499	0.504	0.528
		22	1.839	1.839	1.838	1.852	1.846	1.808	1.83	1.795	0.547	0.539	0.54	0.529	0.518	0.501	0.506	0.529
		22.3333	1.84	1.84	1.836	1.852	1.847	1.808	1.831	1.796	0.549	0.54	0.542	0.531	0.52	0.503	0.508	0.53
		22.6667	1.84	1.84	1.837	1.853	1.849	1.809	1.833	1.798	0.551	0.541	0.543	0.532	0.521	0.504	0.509	0.532
		23	1.842	1.84	1.838	1.854	1.85	1.81	1.834	1.798	0.553	0.543	0.545	0.534	0.523	0.506	0.512	0.533
		23.3333	1.842	1.841	1.838	1.854	1.851	1.812	1.835	1.799	0.555	0.544	0.545	0.535	0.525	0.508	0.513	0.535
		23.6667	1.842	1.841	1.838	1.855	1.852	1.812	1.836	1.8	0.556	0.546	0.547	0.536	0.526	0.509	0.514	0.536
			1.843	1.841	1.84	1.856	1.853	1.813	1.837	1.801	0.558	0.548	0.549	0.537	0.527	0.51	0.517	0.538
			1.844	1.841	1.84	1.855	1.854	1.815	1.838	1.801	0.56	0.55	0.55	0.539	0.529	0.512	0.518	0.541
			1.845	1.842	1.84	1.857	1.856	1.815	1.839	1.801	0.562	0.552	0.551	0.54	0.53	0.514	0.52	0.541
			1.845	1.842	1.839	1.857	1.856	1.817	1.84	1.804	0.564	0.553	0.553	0.541	0.531	0.514	0.52	0.542
			1.845	1.842	1.841	1.858	1.858	1.818	1.841	1.803	0.565	0.554	0.555	0.543	0.533	0.516	0.522	0.545
			1.846	1.843	1.841	1.858	1.859	1.819	1.843	1.806	0.567	0.556	0.556	0.544	0.535	0.519	0.525	0.545
			1.846	1.843	1.841	1.859	1.86	1.82	1.844	1.805	0.569	0.558	0.558	0.546	0.536	0.519	0.526	0.547
			1.847	1.845	1.843	1.859	1.862	1.822	1.845	1.808	0.571	0.559	0.559	0.547	0.537	0.522	0.527	0.549
			1.847	1.846	1.845	1.861	1.864	1.823	1.846	1.808	0.573	0.56	0.56	0.549	0.538	0.522	0.527	0.55
			1.848	1.845	1.843	1.86	1.865	1.824	1.847	1.809	0.574	0.562	0.561	0.55	0.539	0.523	0.528	0.552
			1.848	1.846	1.845	1.861	1.865	1.826	1.848	1.81	0.576	0.563	0.563	0.552	0.54	0.525	0.53	0.552
			1.849	1.848	1.845	1.861	1.867	1.826	1.85	1.811	0.578	0.564	0.565	0.553	0.542	0.527	0.532	0.555
			1.849	1.849	1.843	1.861	1.868	1.827	1.85	1.812	0.579	0.566	0.566	0.554	0.543	0.528	0.534	0.555
			1.849	1.848	1.845	1.862	1.869	1.829	1.852	1.815	0.581	0.567	0.567	0.555	0.545	0.53	0.536	0.557
			1.85	1.849	1.846	1.863	1.871	1.83	1.853	1.815	0.583	0.568	0.568	0.557	0.547	0.531	0.537	0.559
			1.851	1.85	1.846	1.863	1.872	1.832	1.855	1.815	0.584	0.57	0.57	0.558	0.548	0.532	0.538	0.56
			1.851	1.851	1.847	1.864	1.872	1.833	1.856	1.817	0.587	0.571	0.571	0.56	0.548	0.534	0.539	0.561
			1.852	1.851	1.846	1.864	1.874	1.833	1.858	1.818	0.588	0.573	0.572	0.561	0.549	0.534	0.54	0.562
			1.852	1.852	1.847	1.865	1.875	1.835	1.859	1.82	0.59	0.574	0.574	0.563	0.551	0.537	0.542	0.564
			1.853	1.851	1.848	1.865	1.876	1.836	1.86	1.819	0.592	0.575	0.575	0.564	0.552	0.537	0.543	0.565
			1.854	1.852	1.848	1.866	1.877	1.837	1.861	1.823	0.593	0.577	0.577	0.566	0.553	0.54	0.545	0.566
			1.853	1.852	1.849	1.865	1.878	1.838	1.862	1.824	0.595	0.579	0.578	0.567	0.554	0.539	0.546	0.569
			1.853	1.852	1.851	1.867	1.879	1.84	1.863	1.825	0.598	0.58	0.579	0.568	0.556	0.541	0.548	0.57
			1.853	1.853	1.849	1.866	1.88	1.841	1.864	1.825	0.599	0.581	0.581	0.569	0.557	0.543	0.549	0.57
			1.855	1.853	1.851	1.867	1.881	1.841	1.866	1.824	0.601	0.583	0.582	0.571	0.559	0.544	0.55	0.572
			1.855	1.853	1.85	1.868	1.881	1.843	1.867	1.826	0.603	0.584	0.583	0.573	0.559	0.545	0.552	0.573
			1.856	1.853	1.851	1.868	1.882	1.844	1.867	1.828	0.604	0.585	0.585	0.574	0.561	0.547	0.554	0.574
			1.856	1.852	1.852	1.868	1.883	1.845	1.869	1.829	0.606	0.587	0.586	0.575	0.561	0.548	0.553	0.577
			1.857	1.854	1.852	1.869	1.885	1.845	1.87	1.829	0.608	0.588	0.588	0.576	0.563	0.549	0.556	0.577
			1.857	1.855	1.855	1.871	1.886	1.847	1.871	1.83	0.61	0.59	0.589	0.578	0.564	0.55	0.557	0.578
			1.858	1.855	1.853	1.87	1.887	1.848	1.873	1.833	0.611	0.591	0.59	0.58	0.566	0.552	0.558	0.58
			1.857	1.855	1.854	1.87	1.887	1.85	1.873	1.833	0.613	0.592	0.592	0.581	0.566	0.553	0.56	0.581
			1.858	1.856	1.853	1.871	1.89	1.85	1.875	1.833	0.615	0.594	0.594	0.583	0.568	0.554	0.56	0.581
			1.859	1.856	1.854	1.871	1.89	1.851	1.876	1.835	0.617	0.596	0.595	0.585	0.569	0.556	0.561	0.583
			1.859	1.855	1.855	1.871	1.89	1.852	1.877	1.836	0.619	0.596	0.596	0.585	0.57	0.558	0.563	0.585
			1.86	1.857	1.857	1.873	1.892	1.853	1.878	1.837	0.62	0.598	0.598	0.587	0.572	0.558	0.564	0.585
			1.86	1.858	1.858	1.874	1.892	1.854	1.879	1.839	0.622	0.599	0.599	0.588	0.573	0.56	0.566	0.586
			1.86	1.859	1.857	1.874	1.894	1.854	1.88	1.839	0.623	0.601	0.6	0.589	0.574	0.56	0.567	0.588
			1.86	1.859	1.858	1.874	1.894	1.856	1.88	1.84	0.625	0.602	0.601	0.591	0.575	0.562	0.569	0.589
			1.861	1.861	1.857	1.875	1.894	1.857	1.881	1.841	0.626	0.604	0.603	0.592	0.577	0.563	0.569	0.59
			1.862	1.861	1.859	1.875	1.896	1.857	1.883	1.842	0.629	0.605	0.604	0.594	0.577	0.564	0.572	0.591
			1.863	1.861	1.859	1.876	1.897	1.858	1.884	1.843	0.63	0.606	0.605	0.595	0.58	0.566	0.573	0.592
			1.863	1.862	1.858	1.876	1.897	1.86	1.885	1.843	0.631	0.607	0.606	0.596	0.579	0.568	0.574	0.593
			1.863	1.862	1.859	1.876	1.899	1.861	1.886	1.844	0.633	0.609	0.608	0.598	0.58	0.567	0.575	0.596
			1.864	1.863	1.86	1.877	1.899	1.861	1.887	1.844	0.634	0.61	0.609	0.599	0.582	0.569	0.576	0.596
			1.864	1.863	1.86	1.878	1.9	1.862	1.887	1.847	0.636	0.611	0.61	0.599	0.582	0.571	0.578	0.597
			1.864	1.864	1.861	1.878	1.9	1.863	1.888	1.847	0.638	0.613	0.611	0.602	0.584	0.572	0.578	0.599
			1.865	1.864	1.861	1.878	1.901	1.865	1.889	1.847	0.639	0.614	0.612	0.603	0.584	0.573	0.58	0.6
			1.866	1.865	1.861	1.879	1.903	1.865	1.89	1.848	0.64	0.616	0.614	0.604	0.586	0.574	0.582	0.601
			1.866	1.865	1.861	1.879	1.903	1.866	1.891	1.849	0.643	0.617	0.615	0.605	0.587	0.575	0.582	0.602
			1.866	1.865	1.862	1.879	1.904	1.867	1.892	1.85	0.645	0.618	0.616	0.607	0.588	0.576	0.582	0.603
			1.866	1.865	1.862	1.88	1.905	1.867	1.893	1.852	0.646	0.62	0.618	0.608	0.589	0.577	0.583	0.605
			1.868	1.865	1.863	1.88	1.905	1.869	1.894	1.851	0.647	0.621	0.619	0.609	0.591	0.579	0.585	0.605
			1.867	1.866	1.863	1.88	1.906	1.869	1.895	1.852	0.649	0.622	0.62	0.61	0.591	0.579	0.585	0.607
			1.868	1.868	1.864	1.881	1.907	1.87	1.895	1.854	0.65	0.624	0.621	0.611	0.593	0.58	0.587	0.608
			1.868	1.867	1.864	1.881	1.907	1.871	1.896	1.855	0.651	0.625	0.622	0.613	0.594	0.58	0.587	0.609
			1.868	1.867	1.864	1.881	1.909	1.873	1.896	1.855	0.652	0.625	0.623	0.613	0.595	0.582	0.588	0.61
			1.869	1.868	1.865	1.882	1.908	1.873	1.897	1.857	0.653	0.627	0.624	0.616	0.595	0.582	0.589	0.611
			1.87	1.869	1.865	1.882	1.91	1.874	1.898	1.857	0.654	0.628	0.625	0.617	0.596	0.583	0.591	0.612
											0.655	0.63	0.626	0.618	0.597	0.584	0.591	0.614
											0.657	0.631	0.628	0.619	0.598	0.585	0.592	0.615

## Sheet: D
	Fig 4-Figure Supplement 1D
			OD600
		Time(hr)	HG+EtOH			HG+Estradiol			LG+EtOH			LG+Estradiol
		0	0.152	0.152	0.153	0.156	0.15	0.158	0.116	0.117	0.117	0.119	0.116	0.118
		0.333333	0.128	0.128	0.129	0.133	0.127	0.127	0.115	0.116	0.117	0.12	0.118	0.117
		0.666667	0.134	0.132	0.133	0.139	0.132	0.132	0.117	0.12	0.12	0.122	0.12	0.122
		1	0.138	0.133	0.136	0.141	0.136	0.136	0.119	0.12	0.123	0.122	0.12	0.123
		1.33333	0.143	0.139	0.138	0.141	0.135	0.139	0.12	0.121	0.124	0.121	0.119	0.123
		1.66667	0.147	0.144	0.142	0.147	0.139	0.145	0.121	0.123	0.126	0.124	0.12	0.125
		2	0.156	0.149	0.149	0.153	0.144	0.15	0.124	0.125	0.129	0.127	0.123	0.128
		2.33333	0.166	0.156	0.155	0.16	0.15	0.158	0.127	0.127	0.131	0.129	0.126	0.134
		2.66667	0.175	0.164	0.165	0.169	0.158	0.168	0.131	0.131	0.136	0.133	0.13	0.137
		3	0.187	0.175	0.176	0.18	0.167	0.18	0.136	0.137	0.141	0.138	0.135	0.142
		3.33333	0.201	0.187	0.189	0.193	0.178	0.195	0.143	0.142	0.148	0.144	0.14	0.149
		3.66667	0.217	0.201	0.203	0.208	0.19	0.21	0.151	0.149	0.156	0.151	0.147	0.157
		4	0.235	0.216	0.219	0.224	0.205	0.227	0.161	0.158	0.165	0.159	0.155	0.167
		4.33333	0.255	0.234	0.236	0.242	0.22	0.246	0.172	0.168	0.176	0.169	0.164	0.179
		4.66667	0.279	0.252	0.257	0.264	0.238	0.268	0.186	0.18	0.189	0.18	0.175	0.193
		5	0.308	0.275	0.281	0.289	0.259	0.295	0.201	0.193	0.203	0.193	0.188	0.209
		5.33333	0.341	0.302	0.312	0.319	0.282	0.324	0.217	0.209	0.22	0.209	0.203	0.225
		5.66667	0.38	0.333	0.345	0.352	0.31	0.362	0.234	0.225	0.237	0.226	0.219	0.243
		6	0.422	0.369	0.385	0.393	0.341	0.403	0.253	0.244	0.256	0.244	0.237	0.261
		6.33333	0.471	0.411	0.429	0.437	0.379	0.448	0.273	0.263	0.275	0.263	0.257	0.281
		6.66667	0.526	0.455	0.479	0.485	0.419	0.5	0.293	0.283	0.296	0.284	0.277	0.301
		7	0.582	0.506	0.532	0.541	0.466	0.556	0.313	0.302	0.316	0.303	0.297	0.32
		7.33333	0.645	0.56	0.59	0.6	0.516	0.618	0.333	0.322	0.336	0.323	0.316	0.338
		7.66667	0.714	0.621	0.655	0.663	0.572	0.681	0.35	0.339	0.354	0.343	0.336	0.353
		8	0.784	0.684	0.721	0.732	0.632	0.75	0.366	0.357	0.372	0.362	0.354	0.365
		8.33333	0.857	0.75	0.791	0.801	0.697	0.82	0.38	0.372	0.384	0.378	0.368	0.375
		8.66667	0.932	0.823	0.865	0.875	0.763	0.896	0.39	0.382	0.392	0.391	0.377	0.384
		9	1.006	0.894	0.941	0.95	0.834	0.974	0.4	0.394	0.402	0.402	0.385	0.391
		9.33333	1.085	0.966	1.018	1.026	0.908	1.05	0.408	0.404	0.409	0.412	0.394	0.397
		9.66667	1.163	1.044	1.095	1.105	0.982	1.126	0.413	0.41	0.417	0.419	0.402	0.402
		10	1.238	1.118	1.171	1.18	1.056	1.202	0.42	0.417	0.422	0.426	0.408	0.406
		10.3333	1.31	1.194	1.244	1.252	1.135	1.274	0.424	0.422	0.427	0.431	0.414	0.409
		10.6667	1.378	1.266	1.314	1.321	1.205	1.343	0.428	0.427	0.431	0.436	0.419	0.413
		11	1.44	1.337	1.381	1.386	1.275	1.408	0.432	0.431	0.436	0.44	0.423	0.416
		11.3333	1.499	1.399	1.443	1.448	1.343	1.469	0.436	0.435	0.439	0.444	0.427	0.419
		11.6667	1.558	1.462	1.5	1.508	1.406	1.529	0.44	0.438	0.443	0.447	0.43	0.421
		12	1.616	1.519	1.559	1.567	1.466	1.585	0.443	0.441	0.446	0.45	0.433	0.424
		12.3333	1.669	1.576	1.616	1.624	1.526	1.642	0.446	0.443	0.448	0.452	0.435	0.426
		12.6667	1.709	1.631	1.662	1.667	1.581	1.686	0.448	0.445	0.449	0.454	0.438	0.428
		13	1.734	1.674	1.693	1.695	1.631	1.714	0.45	0.447	0.452	0.456	0.439	0.43
		13.3333	1.749	1.7	1.712	1.709	1.666	1.73	0.453	0.449	0.453	0.459	0.441	0.433
		13.6667	1.76	1.718	1.723	1.72	1.686	1.74	0.455	0.451	0.455	0.46	0.443	0.435
		14	1.766	1.728	1.73	1.724	1.699	1.746	0.456	0.453	0.457	0.461	0.444	0.436
		14.3333	1.77	1.735	1.734	1.729	1.707	1.75	0.458	0.455	0.458	0.463	0.447	0.438
		14.6667	1.773	1.74	1.739	1.732	1.711	1.752	0.46	0.456	0.459	0.464	0.448	0.438
		15	1.776	1.742	1.741	1.734	1.715	1.755	0.461	0.458	0.461	0.466	0.449	0.439
		15.3333	1.776	1.745	1.743	1.736	1.717	1.755	0.463	0.459	0.462	0.467	0.45	0.441
		15.6667	1.779	1.747	1.744	1.737	1.719	1.757	0.465	0.46	0.463	0.468	0.45	0.442
		16	1.78	1.749	1.746	1.738	1.72	1.758	0.466	0.461	0.463	0.469	0.453	0.443
		16.3333	1.78	1.75	1.746	1.74	1.722	1.757	0.467	0.461	0.465	0.47	0.454	0.444
		16.6667	1.781	1.752	1.748	1.74	1.723	1.759	0.468	0.463	0.466	0.471	0.455	0.445
		17	1.782	1.753	1.748	1.741	1.724	1.76	0.469	0.464	0.467	0.472	0.455	0.446
		17.3333	1.784	1.754	1.749	1.742	1.726	1.761	0.471	0.465	0.467	0.473	0.456	0.446
		17.6667	1.785	1.755	1.75	1.743	1.726	1.761	0.472	0.466	0.468	0.473	0.457	0.447
		18	1.785	1.755	1.751	1.743	1.728	1.762	0.472	0.467	0.469	0.474	0.458	0.448
		18.3333	1.786	1.755	1.751	1.744	1.728	1.763	0.474	0.468	0.47	0.475	0.459	0.449
		18.6667	1.787	1.757	1.752	1.745	1.728	1.763	0.475	0.468	0.471	0.476	0.459	0.45
		19	1.787	1.757	1.753	1.745	1.729	1.764	0.476	0.469	0.471	0.476	0.46	0.45
		19.3333	1.788	1.758	1.753	1.746	1.73	1.765	0.477	0.47	0.472	0.477	0.461	0.451
		19.6667	1.788	1.759	1.754	1.746	1.732	1.765	0.478	0.471	0.473	0.478	0.462	0.452
		20	1.789	1.76	1.755	1.747	1.731	1.766	0.479	0.471	0.474	0.479	0.463	0.452
		20.3333	1.79	1.76	1.755	1.746	1.733	1.767	0.479	0.472	0.475	0.479	0.463	0.453
		20.6667	1.79	1.76	1.756	1.748	1.733	1.767	0.481	0.473	0.476	0.481	0.464	0.454
		21	1.79	1.761	1.757	1.748	1.733	1.768	0.481	0.474	0.476	0.482	0.465	0.455
		21.3333	1.79	1.762	1.757	1.748	1.734	1.768	0.482	0.475	0.477	0.482	0.466	0.456
		21.6667	1.791	1.762	1.757	1.749	1.734	1.769	0.483	0.476	0.478	0.483	0.466	0.457
		22	1.792	1.762	1.758	1.749	1.735	1.769	0.484	0.476	0.479	0.484	0.468	0.458
		22.3333	1.793	1.763	1.758	1.749	1.735	1.77	0.485	0.477	0.48	0.485	0.468	0.458
		22.6667	1.793	1.763	1.759	1.75	1.737	1.77	0.486	0.478	0.481	0.486	0.469	0.459
		23	1.793	1.764	1.759	1.75	1.737	1.771	0.488	0.479	0.482	0.486	0.47	0.46
		23.3333	1.794	1.765	1.759	1.75	1.738	1.772	0.488	0.48	0.482	0.487	0.471	0.461
		23.6667	1.795	1.765	1.761	1.751	1.739	1.772	0.489	0.481	0.483	0.488	0.472	0.462
			1.795	1.766	1.761	1.752	1.739	1.773	0.49	0.481	0.484	0.489	0.473	0.463
			1.795	1.766	1.762	1.752	1.739	1.774	0.492	0.482	0.485	0.489	0.474	0.464
			1.795	1.767	1.762	1.753	1.739	1.774	0.493	0.483	0.486	0.49	0.475	0.465
			1.797	1.767	1.762	1.753	1.74	1.774	0.494	0.484	0.488	0.492	0.476	0.465
			1.797	1.768	1.763	1.753	1.74	1.775	0.495	0.485	0.489	0.492	0.477	0.466
			1.797	1.768	1.764	1.754	1.741	1.775	0.496	0.486	0.489	0.493	0.478	0.467
			1.797	1.768	1.764	1.754	1.742	1.775	0.497	0.487	0.49	0.494	0.479	0.468
			1.797	1.769	1.765	1.755	1.742	1.775	0.498	0.488	0.491	0.495	0.479	0.469
			1.798	1.769	1.765	1.755	1.742	1.776	0.499	0.489	0.492	0.496	0.481	0.471
									0.5	0.49	0.493	0.498	0.481	0.471
									0.501	0.491	0.494	0.498	0.482	0.472
									0.502	0.492	0.495	0.5	0.484	0.473
									0.503	0.493	0.496	0.5	0.485	0.474
									0.504	0.495	0.497	0.501	0.486	0.475
									0.505	0.495	0.498	0.502	0.486	0.476
									0.507	0.496	0.499	0.503	0.487	0.477
									0.508	0.497	0.5	0.504	0.488	0.478
									0.509	0.498	0.501	0.505	0.489	0.48
									0.511	0.499	0.502	0.506	0.49	0.48
									0.512	0.5	0.503	0.508	0.491	0.481
									0.513	0.502	0.504	0.509	0.492	0.482
									0.514	0.502	0.505	0.51	0.493	0.483
									0.515	0.504	0.506	0.51	0.494	0.484
									0.516	0.504	0.507	0.512	0.496	0.485
									0.517	0.505	0.509	0.513	0.497	0.486
									0.518	0.506	0.51	0.513	0.498	0.487
									0.519	0.508	0.51	0.515	0.499	0.488
									0.521	0.509	0.511	0.515	0.5	0.489
									0.521	0.51	0.513	0.517	0.501	0.49
									0.522	0.51	0.513	0.518	0.502	0.492
									0.524	0.511	0.515	0.519	0.504	0.493
									0.525	0.512	0.516	0.52	0.504	0.494
									0.526	0.514	0.517	0.521	0.506	0.495
									0.527	0.515	0.517	0.522	0.507	0.495
									0.528	0.516	0.519	0.523	0.507	0.496
									0.529	0.517	0.52	0.524	0.508	0.497
									0.53	0.518	0.522	0.525	0.51	0.499
									0.531	0.519	0.522	0.526	0.511	0.5
									0.532	0.52	0.523	0.527	0.511	0.5
									0.533	0.521	0.524	0.528	0.512	0.501
									0.535	0.522	0.525	0.529	0.514	0.502
									0.536	0.523	0.526	0.53	0.515	0.503
									0.537	0.524	0.527	0.531	0.515	0.504
									0.538	0.525	0.528	0.532	0.516	0.506
									0.538	0.526	0.529	0.533	0.517	0.507
									0.54	0.527	0.53	0.534	0.518	0.509
									0.541	0.528	0.531	0.535	0.52	0.509
									0.541	0.529	0.532	0.536	0.52	0.51
									0.542	0.53	0.533	0.537	0.521	0.511
									0.544	0.53	0.534	0.538	0.523	0.512
									0.545	0.531	0.535	0.539	0.523	0.513
									0.546	0.533	0.536	0.541	0.524	0.514
									0.546	0.534	0.537	0.541	0.525	0.515
									0.548	0.534	0.538	0.542	0.526	0.516
									0.549	0.536	0.539	0.543	0.527	0.517
									0.55	0.537	0.539	0.544	0.528	0.517

## Sheet: C-E-I-K
	Fig 4-Figure Supplement 1C
		Relative growth rate (Estradiol/EtOH)
		HG				LG
		Control	Tom70cd	Tom70cd(Δ98-214)	Tom70cd(Δ247-617)	Control	Tom70cd	Tom70cd(Δ98-214)	Tom70cd(Δ247-617)
		0.809041	0.705343	0.788637	0.808112	1.02016	0.83348	0.98495	0.93101
		0.790866	0.701712	0.824326	0.814099	0.89543	0.7559	0.92748	0.94314
		0.815732	0.711908	0.798844	0.79113	0.86614	0.74048	0.93123	0.93369
			0.682434	0.827637	0.80325		0.83657	0.9498	1.0142
	Fig 4-Figure Supplement 1E
		Growth rate (OD600/hr)
		HG	HG	LG	LG
		EtOH	Estradiol	EtOH	Estradiol
		0.229624	0.22819	0.057497	0.058396
		0.225327	0.223932	0.056632	0.057178
		0.229103	0.228929	0.057732	0.055374
	Fig 4-Figure Supplement 1I
		Mean aSyn spGFP intensity
		REG1	Δreg1
		0.00118	0.000213
		0.00161	0.00051
		0.000757	0.0004
			0.000276
	Fig 4-Figure Supplement 1K
		Mean FUS-P525L spGFP intensity
		REG1	Δreg1
		0.001619	0.000392106
		0.001739	0.000254742
		0.001413	0.000171183
		0.001418	0.000303811
