# Supplementary material for: Metabolic regulation of misfolded protein import into mitochondria
Source: eLife. 2024 Jun 20;12:RP87518. doi: 10.7554/eLife.87518 (PMC11189628; doi:10.7554/eLife.87518)
Supplement: Figure 4—source data 1. [file elife-87518-fig4-data1.xlsx]

## Sheet: Sheet1
	Fig 4A
		Growth rate (OD600/hr)
		HG				LG
		EtOH	Estradiol	EtOH	Estradiol	EtOH	Estradiol	EtOH	Estradiol
		Control	Control	Tom70cd	Tom70cd	Control	Control	Tom70cd	Tom70cd
		0.221896	0.179523	0.212376	0.149798	0.060951	0.062179	0.063577	0.05299
		0.22464	0.17766	0.216966	0.152247	0.071752	0.064249	0.064544	0.048789
		0.227008	0.185177	0.219707	0.156411	0.072366	0.062679	0.066685	0.049379
				0.217871	0.148683			0.065268	0.054601
	Fig 4B
		Fraction of FlucSM spGFP-positive cells
		HG	HG	LG	LG
		Control	Tom70cd	Control	Tom70cd
		0.501	0.754	0.211	0.617
		0.449	0.724	0.241	0.65
		0.443	0.76	0.224	0.686
	Fig 4C
		Mean TMRM intensity
		HG				LG
		Negative spGFP	Positive spGFP	Negative spGFP	Positive spGFP	Negative spGFP	Positive spGFP	Negative spGFP	Positive spGFP
		Control	Control	Tom70cd	Tom70cd	Control	Control	Tom70cd	Tom70cd
		4393	1935	4856	1393	14925	15091	14298	13670
		4501	1874	5630	1577	13254	13017	13858	12818
		3743	1413	4288	1052	13582	13338	14513	13275
	Fig 4F
		Mean aSyn spGFP intensity
		HG	HG	LG	LG
		Control	Tom70cd	Control	Tom70cd
		0.00118	0.005526	0.000479	0.000927
		0.00161	0.003002	0.000557	0.000978
		0.000757	0.004777	0.00022	0.001025
	Fig 4G
		Fraction of aSyn spGFP-positive cells
		HG	HG	LG	LG
		Control	Tom70cd	Control	Tom70cd
		0.0768	0.504	0.0169	0.124
		0.0699	0.476	0.0173	0.113
		0.0775	0.451	0.0163	0.104
	Fig 4H
		Mean FUS-P525L spGFP intensity
		HG	HG	LG	LG
		Control	Tom70cd	Control	Tom70cd
		0.001619	0.002342	0.000438	0.001708
		0.001739	0.002471	0.000465	0.001577
		0.001413	0.00257	0.000412	0.001346
		0.001418	0.001714	0.000647	0.001439
	Fig 4I
		Fraction of FUS-P525L spGFP-positive cells
		HG	HG	LG	LG
		Control	Tom70cd	Control	Tom70cd
		0.159	0.37	0.0346	0.129
		0.146	0.375	0.0234	0.123
		0.167	0.403	0.028	0.121
		0.127	0.377	0.0205	0.117
	Fig 4J
		Mean TMRM intensity
		HG				LG
		Negative spGFP	Positive spGFP	Negative spGFP	Positive spGFP	Negative spGFP	Positive spGFP	Negative spGFP	Positive spGFP
		Control	Control	Tom70cd	Tom70cd	Control	Control	Tom70cd	Tom70cd
		4901	1292	4350	920	8624	n.d.	8345	4336
		5115	1260	4313	854	8535	n.d.	8289	3932
		4494	1100	4738	967	9562	n.d.	8324	4016
	Fig 4K
		Mean TMRM intensity
		HG				LG
		Negative spGFP	Positive spGFP	Negative spGFP	Positive spGFP	Negative spGFP	Positive spGFP	Negative spGFP	Positive spGFP
		Control	Control	Tom70cd	Tom70cd	Control	Control	Tom70cd	Tom70cd
		5256	2126	8105	2127	18149	n.d.	21152	17675
		5413	1975	6874	1696	19941	n.d.	18327	14948
		3939	1590	5897	1432	19338	n.d.	18407	12438
		5632	1817	7379	1787	20639	n.d.	22119	18425
	Fig 4L
		Fraction of petite cells
		Control	Tom70cd	αSyn	αSyn & Tom70cd
		0.083	0.205	0.256	0.671
		0.099	0.2	0.238	0.604
		0.096	0.247	0.271	0.649
			0.186	0.32
