# Supplementary material for: Metabolic regulation of misfolded protein import into mitochondria
Source: eLife. 2024 Jun 20;12:RP87518. doi: 10.7554/eLife.87518 (PMC11189628; doi:10.7554/eLife.87518)
Supplement: Figure 5—source data 1. [file elife-87518-fig5-data1.xlsx]

## Sheet: Sheet1
	Fig 5B
		Mean spGFP intensity
		GST		FUS-P525L
		No AICAR	AICAR	No AICAR	AICAR
		485	370	1472	872
		394	373	1954	1193
		482	368	1938	1247
	Fig 5C
		Fraction of TMRM-negative cells
		GST		FUS-P525L
		No AICAR	AICAR	No AICAR	AICAR
		0.0263158	0.0357895	0.0887719	0.0324561
		0.03375	0.0441667	0.119583	0.040625
		0.013	0.0415	0.058	0.02375
		0.0125926	0.0311111	0.0461111	0.0212963
	Fig 5D
		Normalized cell viability
		GST		FUS-P525L
		No AICAR	AICAR	No AICAR	AICAR
		1	0.99524	0.587054	0.939334
		1	1.0304	0.719049	0.940876
		1	0.851505	0.555473	0.751536
		1	0.882295	0.520212	0.754327
